# Supplementary material for: Processing of lignin in urea–zinc chloride deep-eutectic solvent and its use as a filler in a phenol-formaldehyde resin
Source: Royal Society of Chemistry journal article supplement (doi:10.1039/c4ra16734a), 2015-01-01
Supplement: c4ra16734a1.pdf [file c4ra16734a1.pdf]

## Electronic Supplementary Information

### Processing of lignin in urea/zinc chloride deep-eutectic solvent and its use as filler in a phenol-formaldehyde resin

By Hailan Lian, Shu Hong, Arturo Carranza, Josué D. Mota-Morales\*, John A. Pojman\*

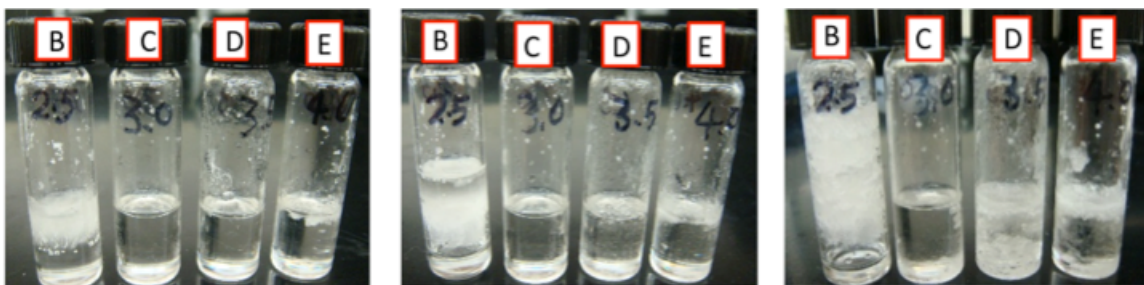

**Figure S1.** Storage of DES prepared under oil bath after (left) the second day, (center) the 10th day (right) after the 30th day.

**Table S1.** DSC results for different DESs.

| Molar Ratio<br>(ZnCl <sub>2</sub> /urea) | 2.5:10 | 3:10  | 3.5:10 | 4:10  |
|------------------------------------------|--------|-------|--------|-------|
| Onset Temperature                        | -30.2  | -29.6 | -28.6  | -28.3 |
| T <sub>g</sub> (at inflexion point)      | -27.0  | -26.3 | -24.2  | -24.2 |
| Offset Temperature                       | -24.4  | -22.6 | -19.7  | -21.1 |

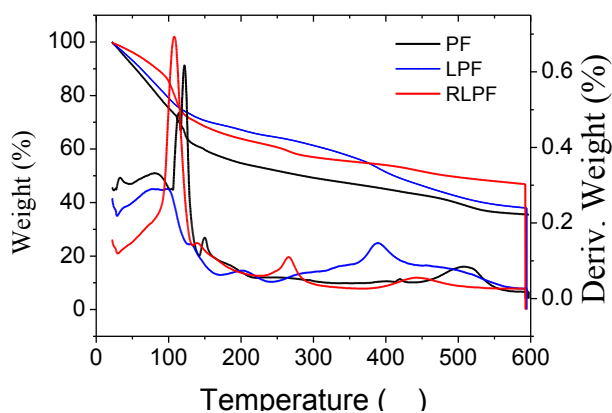

**Figure S2.** TG and DTG curves of PF, LPF and RLPF resin.

## Lignin digestion

A 6.0 mg sample of lignin or relignin was digested with 2.0 mL of 3:1 sulfuric acid and 30% hydrogen peroxide. 1.46 ml of nitric acid was added to the solution and diluted to 10 mL, lightly heated for 2 hours until digestion was completed and the mixture was clear with no solids. Samples were then diluted to 50 mL to achieve a 2% nitric acid solution.

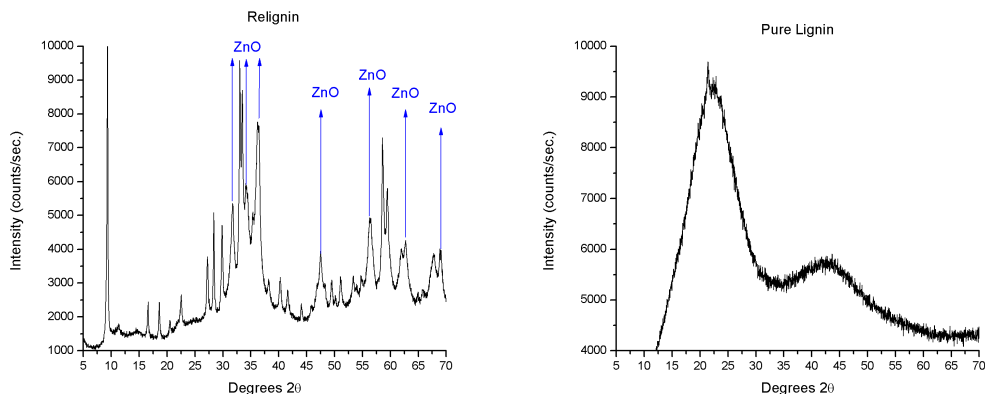

**Figure S3.** XRD diffractograms of relignin and bare lignin.

| 2θ (Degrees) |              |                  |                                |
|--------------|--------------|------------------|--------------------------------|
| Lignin       | Relignin     | ZnO <sup>1</sup> | ZnCl <sub>2</sub> <sup>2</sup> |
|              | 16.57        | -                | 16.61                          |
| <b>22.17</b> | -            | -                | -                              |
|              | <b>31.72</b> | 31.70            | -                              |
|              | 34.24        | 34.38            | -                              |
|              | <b>36.34</b> | 36.18            | -                              |
|              | 38.21        | -                | 38.21                          |
| <b>42.10</b> | -            | -                | -                              |
|              | <b>47.51</b> | 47.45            | -                              |
|              | <b>56.27</b> | 56.46            | 56.25                          |
|              | <b>58.58</b> | -                | 58.58                          |
|              | 62.63        | 62.76            | -                              |
|              | <b>67.81</b> | -                | 67.80                          |
|              | 69.01        | 69.01            | -                              |

<sup>1</sup>Bold Denotes Major peaks

**Table S1.** Diffraction peaks matching crystalline structures of ZnO and ZnCl<sub>2</sub> for both relignin and lignin.

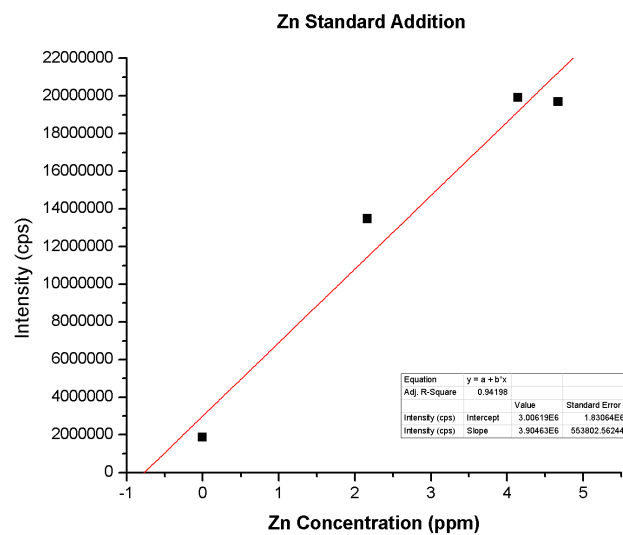

**Figure S4.** Calculation of Zn via standard addition by ICP-MS.

\*RSD Error bars are < 00.2%

## References

1. Albertsson J., Abrahams S.C., Kvick A., Acta Crystallogr., Sec. B: Struct. Sci., 45, 34, (1989).
2. Brehler., Z. Kristallogr., Kristallgeom., Kristallphys., Kristallchem., 115, 373, (1961)
